# Supplementary material for: The Bactericidal Activity of Temporin Analogues Against Methicillin Resistant Staphylococcus aureus
Source: PubMed Central journal article supplement (PMC6801822; doi:10.3390/ijms20194761), 2019-09-25
Supplement: ijms-20-04761-s001.pdf [file ijms-20-04761-s001.pdf]

**Table S1.** Primary structures of the peptides.

| Compound      | Primary sequence                                    |
|---------------|-----------------------------------------------------|
| DK5           | IKKILSkIKKLL-NH <sub>2</sub>                        |
| DAL           | YaGFLR                                              |
| CAR           | βAH                                                 |
| CAR3          | βAH βAH βAH                                         |
| COMB1         | EGLEPG                                              |
| DK5-PEG-DAL   | IKKILSkIKKLL-PEG-YaGFLR                             |
| DAL-PEG-DK5   | YaGFLR-PEG- <b>IKKILSkIKKLL</b> -NH <sub>2</sub>    |
| CAR-PEG-DK5   | βAH-PEG- <b>IKKILSkIKKLL</b> -NH <sub>2</sub>       |
| CAR3-PEG-DK5  | βAHβAHβAH-PEG- <b>IKKILSkIKKLL</b> -NH <sub>2</sub> |
| COMB1-PEG-DK5 | EGLEPG-PEG- <b>IKKILSkIKKLL</b> -NH <sub>2</sub>    |

D-analogues of the amino acids are marked as small bold letters; βA refers to β-Ala amino acid residue.

**Table S2.** Characterization of methicillin resistant *S. aureus* (MRSA) clinical isolates.

| MRSA strain ID | Source | Macrolide resistance phenotype | Other antibiotic resistance phenotype |
|----------------|--------|--------------------------------|---------------------------------------|
| 56A1           | skin   | cMLS <sub>B</sub>              | P, C, CL, DO*, G, TOB, K              |
| 52B            | skin   | lack of resistance             | P                                     |
| 1694           | blood  | cMLS <sub>B</sub>              | P, TE, CIP, CN, AK, TOB, DO, K        |
| 2492           | blood  | cMLS <sub>B</sub>              | P, TE, CIP, AK*, TOB, K               |
| 2706           | blood  | cMLS <sub>B</sub>              | P, CIP, TOB, K                        |
| 2872cv         | blood  | cMLS <sub>B</sub>              | P, TE, CIP, CN, AK, TOB, DO, K        |
| 3417           | blood  | cMLS <sub>B</sub>              | P, K*                                 |
| 4187           | blood  | lack of resistance             | P                                     |
| 6674           | blood  | cMLS <sub>B</sub>              | P, TE, CIP, CN, AK, TOB, DO, K        |
| 7219           | blood  | cMLS <sub>B</sub>              | P, TE, CIP, CN, AK, TOB, DO, K        |
| 7501           | blood  | iMLS <sub>B</sub>              | P, CIP, TOB, K, DA                    |
| 7569           | blood  | iMLS <sub>B</sub>              | P, CIP, AK*, TOB, K, DA               |
| 7718           | blood  | cMLS <sub>B</sub>              | P, CIP, TOB, K                        |

MLS<sub>B</sub>, resistance to macrolides, lincosamides and streptogramins B; the prefix letter refers to the constitutive expression of this phenotype (cMLS<sub>B</sub>) or inducible expression of the phenotype (iMLS<sub>B</sub>);

AK, amikacin; C, chloramphenicol; CIP, ciprofloxacin; CL, clindamycin; CN, cephalexin; DA, dalfopristin; DO, doxycycline; G, gentamycin; K, kanamycin; P, penicillin; TE, tetracycline; TOB, tobramycin; XXX\*, intermediate resistance.
